# Supplementary material for: Understanding the bonding and aromaticity of [Au3{C4H4(X)4E}3]− (X = CF3, CN, BO; E = Si, Ge): trinuclear gold superhalogens
Source: Royal Society of Chemistry journal article supplement (doi:10.1039/d3nj05422e), 2024-01-01
Supplement: d3nj05422e1.pdf [file d3nj05422e1.pdf]

## Supporting Information

### Understanding the bonding and aromaticity of $[\text{Au}_3\{\text{C}_4\text{H}_4(\text{X})_4\text{E}\}_3]^-$ ( $\text{X}=\text{CF}_3$ , $\text{CN}$ , $\text{BO}$ ; $\text{E}=\text{Si}$ , $\text{Ge}$ ): a trinuclear gold superhalogens

Subhra Das<sup>a,c</sup>, Swapan Sinha<sup>a</sup>, Gourisankar Roymahapatra<sup>a</sup>, Mesías Orozco-Ic,<sup>b\*</sup> Gobinda Chandra De,<sup>c\*</sup> Santanab Giri<sup>a\*</sup>

<sup>a</sup>School of Applied Science and Humanities, Haldia Institute of Technology, ICARE Complex, West Bengal 721657, India.

<sup>b</sup>Donostia International Physics Center (DIPC), 20018 Donostia, Euskadi, Spain.

<sup>c</sup>Department of Chemistry, Cooch Behar PanchananBarma University, Cooch Behar, 736101, West Bengal, India.

Corresponding Author Email: [mesias.orozco@dipc.org](mailto:mesias.orozco@dipc.org), [degobinda@yahoo.com](mailto:degobinda@yahoo.com), [santanab.giri@gmail.com](mailto:santanab.giri@gmail.com),

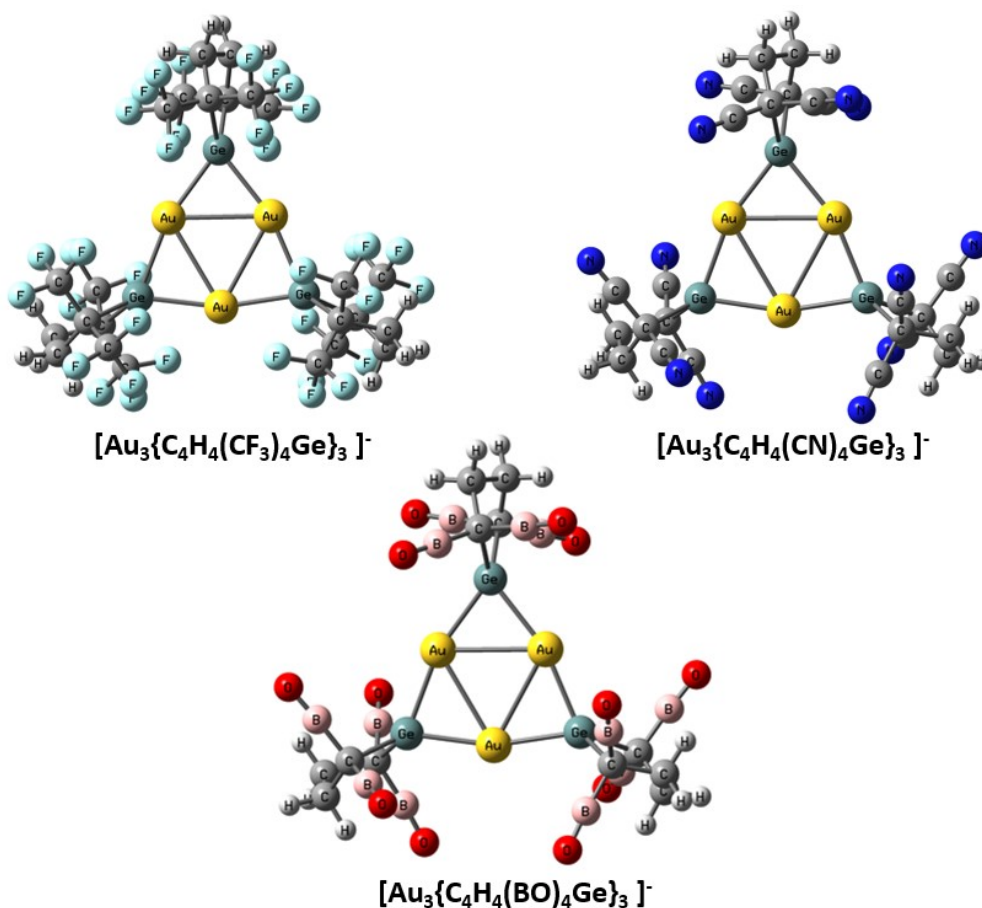

Fig S1: Optimized geometries of  $[\text{Au}_3\{\text{C}_4\text{H}_4(\text{CF}_3)_4\text{Ge}\}_3]^-$ ,  $[\text{Au}_3\{\text{C}_4\text{H}_4(\text{CN})_4\text{Ge}\}_3]^-$ ,  $[\text{Au}_3\{\text{C}_4\text{H}_4(\text{BO})_4\text{Ge}\}_3]^-$  complexes.

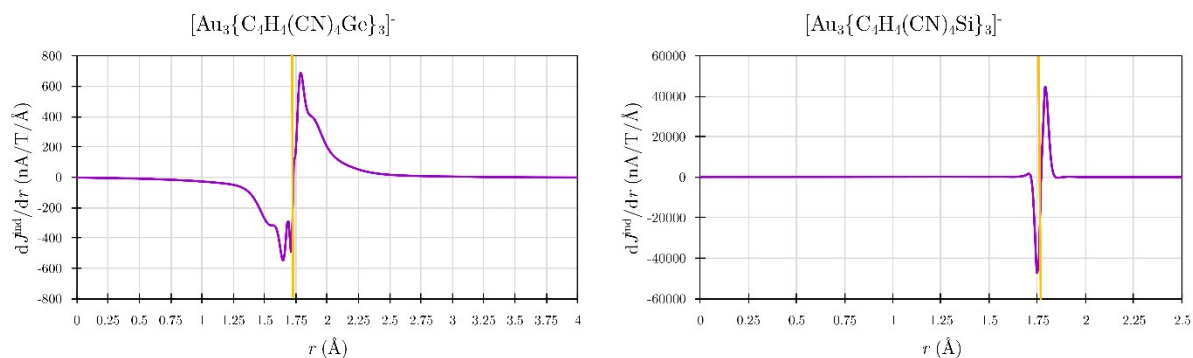

Fig S2: Ring-current profile for  $[\text{Au}_3\{\text{C}_4\text{H}_4(\text{CN})_4\text{Ge}\}_3]^-$  and  $[\text{Au}_3\{\text{C}_4\text{H}_4(\text{CN})_4\text{Si}\}_3]^-$ . The vertical yellow line corresponds to the intersection of the integration plane with the Au nucleus. The abrupt sharp peaks of the curves correspond to the atomic circulations near the nuclei. Since the dia- and paratropic contributions of these atomic currents cancel each other near the intersection, when integrating the area under the curve, the remaining quantity is a good approximation of the ring-current strength.

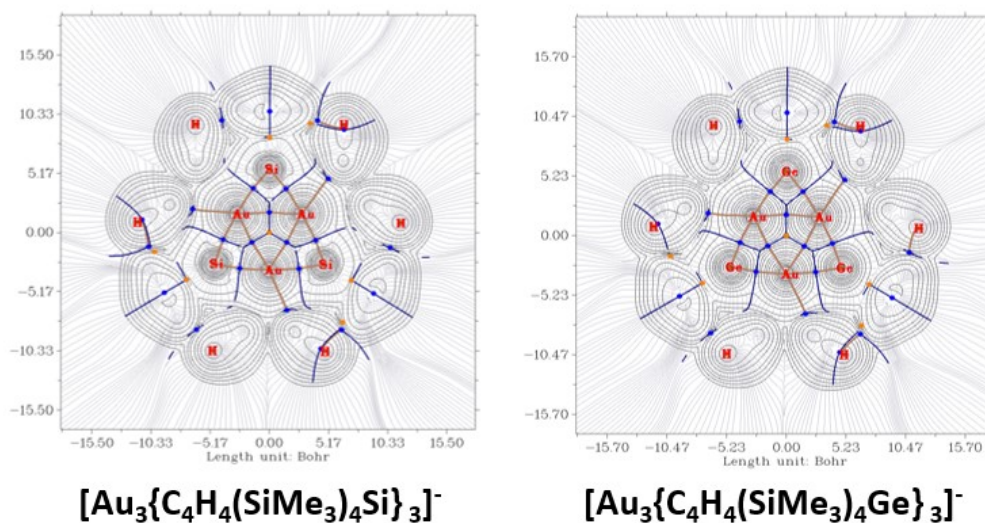

Fig S3: Contour plot of the Laplacian of the electron density along with bond path and bond critical points of  $[\text{Au}_3\{\text{C}_4\text{H}_4(\text{SiMe}_3)_4\text{Si}\}_3]^-$ ,  $[\text{Au}_3\{\text{C}_4\text{H}_4(\text{SiMe}_3)_4\text{Ge}\}_3]^-$ .

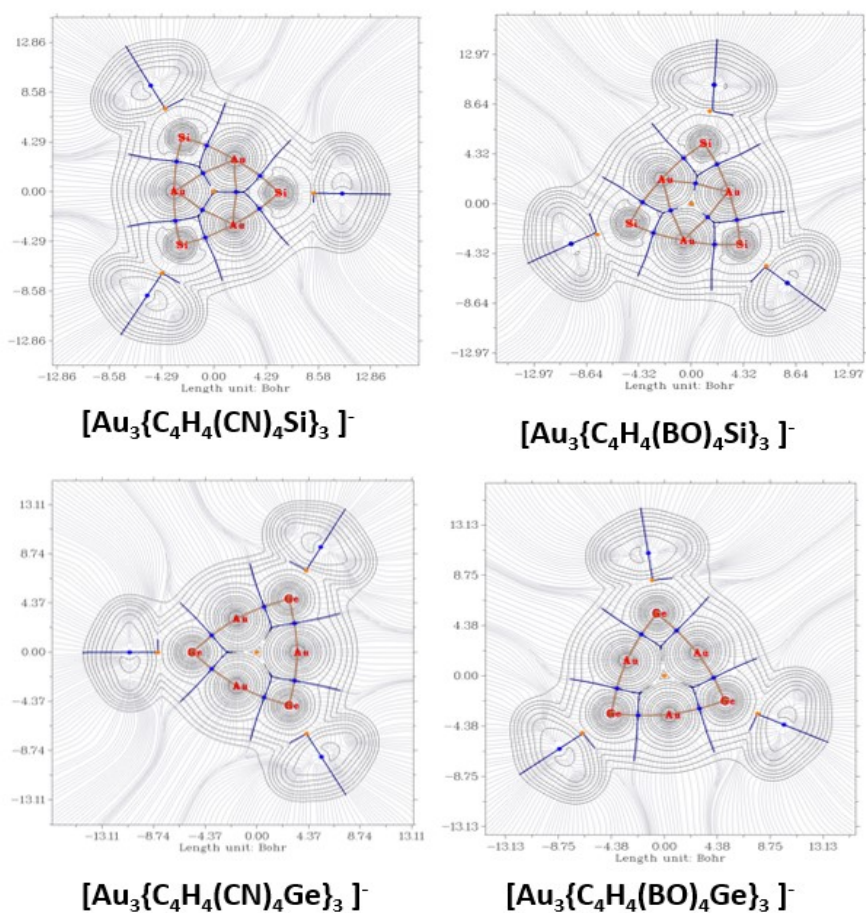

Fig S4: Contour plot of the Laplacian of the electron density along with bond path and bond critical points of  $[\text{Au}_3\{\text{C}_4\text{H}_4(\text{CN})_4\text{Si}\}_3]^-$ ,  $[\text{Au}_3\{\text{C}_4\text{H}_4(\text{BO})_4\text{Si}\}_3]^-$ ,  $[\text{Au}_3\{\text{C}_4\text{H}_4(\text{CN})_4\text{Ge}\}_3]^-$  and  $[\text{Au}_3\{\text{C}_4\text{H}_4(\text{BO})_4\text{Si}\}_3]^-$

Table S1: Calculated AIM parameters at BCP (3, -1) of  $[\text{Au}_3\{\text{C}_4\text{H}_4(\text{CN})_4\text{Si}\}_3]^-$ ,  $[\text{Au}_3\{\text{C}_4\text{H}_4(\text{BO})_4\text{Si}\}_3]^-$ ,  $[\text{Au}_3\{\text{C}_4\text{H}_4(\text{CN})_4\text{Ge}\}_3]^-$  and  $[\text{Au}_3\{\text{C}_4\text{H}_4(\text{BO})_4\text{Si}\}_3]^-$  respectively.

| Complex                                                           | BCP                               | $\rho$ | Laplacian<br>electron density<br>( $\nabla^2\rho(r)$ ) | $-\text{G}_{\text{CP}}/\text{V}_{\text{CP}}$ |
|-------------------------------------------------------------------|-----------------------------------|--------|--------------------------------------------------------|----------------------------------------------|
| $[\text{Au}_3\{\text{C}_4\text{H}_4(\text{CN})_4\text{Si}\}_3]^-$ | Au <sub>1</sub> -Au <sub>2</sub>  | 0.039  | 0.066                                                  | 0.778                                        |
|                                                                   | Au <sub>2</sub> -Au <sub>21</sub> | 0.039  | 0.065                                                  | 0.778                                        |
|                                                                   | Au <sub>21</sub> -Au <sub>1</sub> | 0.038  | 0.066                                                  | 0.778                                        |
|                                                                   | Au <sub>1</sub> -Si <sub>3</sub>  | 0.072  | -0.0026                                                | 0.491                                        |
|                                                                   | Au <sub>1</sub> -Si <sub>22</sub> | 0.072  | -0.0026                                                | 0.491                                        |
|                                                                   | Au <sub>2</sub> -Si <sub>3</sub>  | 0.072  | -0.0025                                                | 0.491                                        |
|                                                                   | Au <sub>2</sub> -Si <sub>4</sub>  | 0.072  | -0.0027                                                | 0.491                                        |

|                                                                                                   |                                    |       |         |       |
|---------------------------------------------------------------------------------------------------|------------------------------------|-------|---------|-------|
|                                                                                                   | Au <sub>21</sub> -Si <sub>4</sub>  | 0.072 | -0.0027 | 0.491 |
|                                                                                                   | Au <sub>21</sub> -Si <sub>22</sub> | 0.072 | -0.0025 | 0.491 |
| [Au <sub>3</sub> {C <sub>4</sub> H <sub>4</sub> (BO) <sub>4</sub> Si} <sub>3</sub> ] <sup>-</sup> | Au <sub>1</sub> -Au <sub>2</sub>   | 0.392 | 0.0652  | 0.794 |
|                                                                                                   | Au <sub>2</sub> -Au <sub>21</sub>  | 0.393 | 0.0652  | 0.791 |
|                                                                                                   | Au <sub>21</sub> -Au <sub>1</sub>  | 0.393 | 0.0653  | 0.788 |
|                                                                                                   | Au <sub>1</sub> -Si <sub>3</sub>   | 0.072 | -0.0037 | 0.482 |
|                                                                                                   | Au <sub>1</sub> -Si <sub>22</sub>  | 0.072 | -0.0036 | 0.482 |
|                                                                                                   | Au <sub>2</sub> -Si <sub>3</sub>   | 0.072 | -0.0039 | 0.482 |
|                                                                                                   | Au <sub>2</sub> -Si <sub>4</sub>   | 0.072 | -0.0035 | 0.482 |
|                                                                                                   | Au <sub>21</sub> -Si <sub>4</sub>  | 0.072 | -0.0039 | 0.482 |
|                                                                                                   | Au <sub>21</sub> -Si <sub>22</sub> | 0.072 | -0.0038 | 0.482 |
| [Au <sub>3</sub> {C <sub>4</sub> H <sub>4</sub> (CN) <sub>4</sub> Ge} <sub>3</sub> ] <sup>-</sup> | Au <sub>1</sub> -Ge <sub>53</sub>  | 0.063 | 0.0563  | 0.556 |
|                                                                                                   | Au <sub>1</sub> -Ge <sub>54</sub>  | 0.063 | 0.0563  | 0.556 |
|                                                                                                   | Au <sub>2</sub> -Ge <sub>52</sub>  | 0.063 | 0.0563  | 0.556 |
|                                                                                                   | Au <sub>2</sub> -Ge <sub>53</sub>  | 0.063 | 0.0565  | 0.556 |
|                                                                                                   | Au <sub>19</sub> -Ge <sub>52</sub> | 0.063 | 0.0563  | 0.556 |
| [Au <sub>3</sub> {C <sub>4</sub> H <sub>4</sub> (BO) <sub>4</sub> Ge} <sub>3</sub> ] <sup>-</sup> | Au <sub>1</sub> -Ge <sub>53</sub>  | 0.063 | 0.0555  | 0.556 |
|                                                                                                   | Au <sub>1</sub> -Ge <sub>54</sub>  | 0.063 | 0.0555  | 0.556 |
|                                                                                                   | Au <sub>2</sub> -Ge <sub>52</sub>  | 0.063 | 0.0576  | 0.556 |
|                                                                                                   | Au <sub>2</sub> -Ge <sub>53</sub>  | 0.063 | 0.0557  | 0.556 |
|                                                                                                   | Au <sub>19</sub> -Ge <sub>52</sub> | 0.063 | 0.0558  | 0.556 |

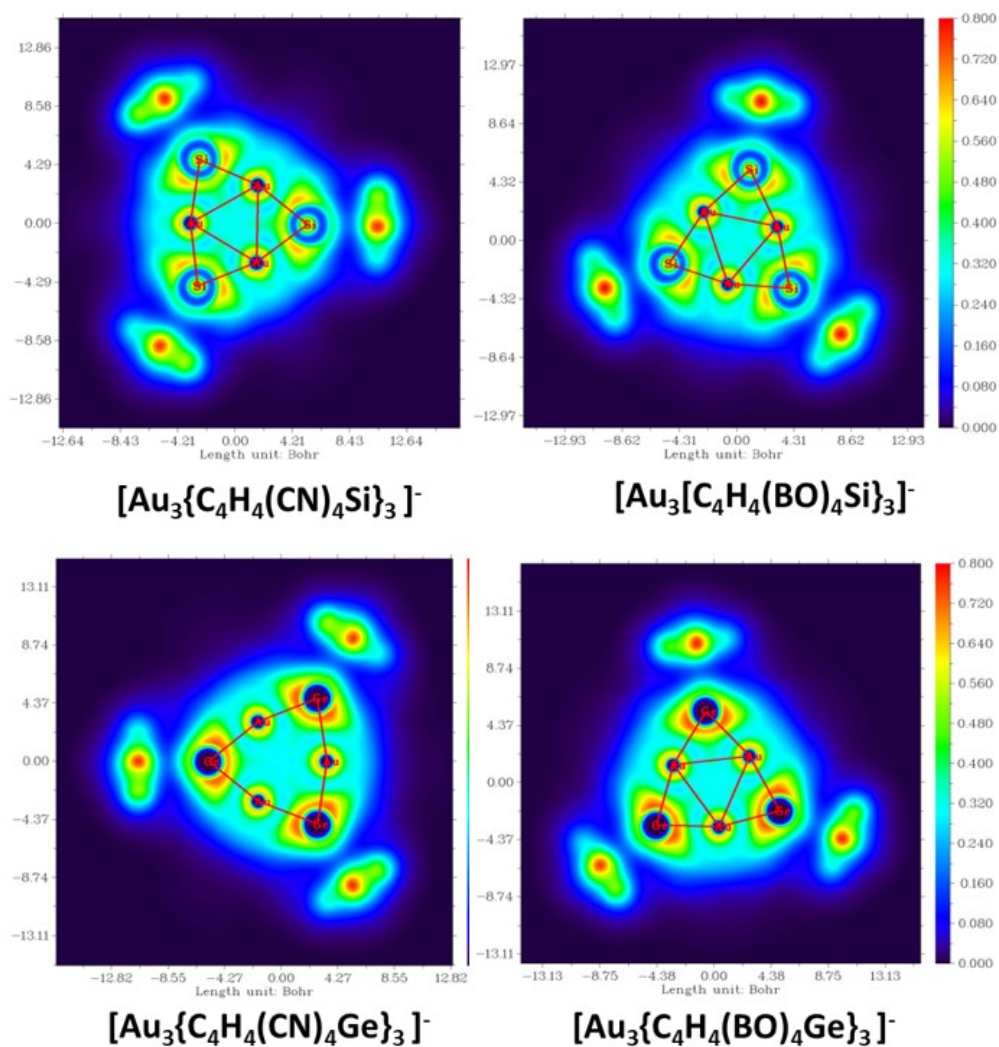

Fig S5: Cut of plane ELF plot of  $[\text{Au}_3\{\text{C}_4\text{H}_4(\text{CN})_4\text{Si}\}_3]^-$ ,  $[\text{Au}_3\{\text{C}_4\text{H}_4(\text{BO})_4\text{Si}\}_3]^-$ ,  $[\text{Au}_3\{\text{C}_4\text{H}_4(\text{CN})_4\text{Ge}\}_3]^-$  and  $[\text{Au}_3\{\text{C}_4\text{H}_4(\text{BO})_4\text{Si}\}_3]^-$ .

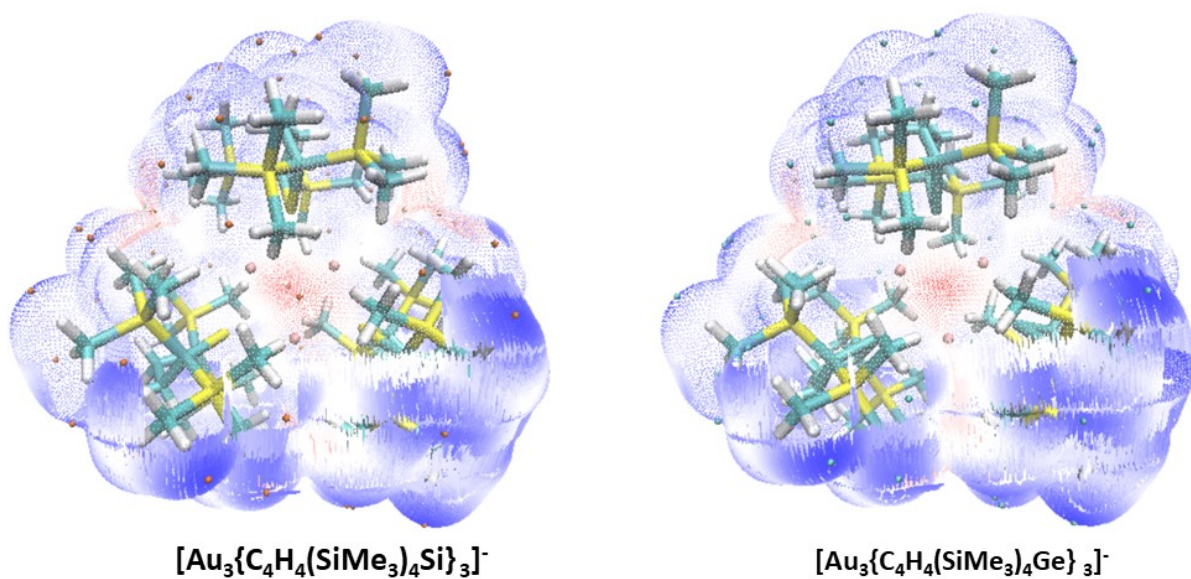

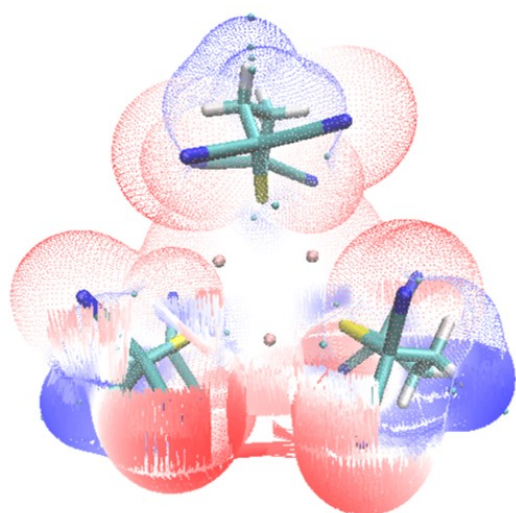

$[\text{Au}_3\{\text{C}_4\text{H}_4(\text{CN})_4\text{Si}\}_3]^-$

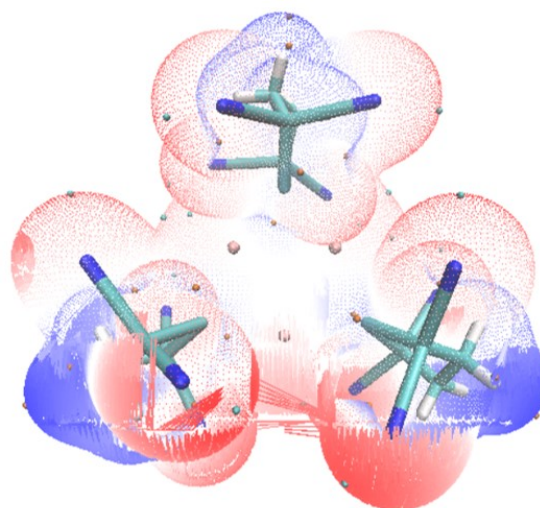

$[\text{Au}_3\{\text{C}_4\text{H}_4(\text{CN})_4\text{Ge}\}_3]^-$

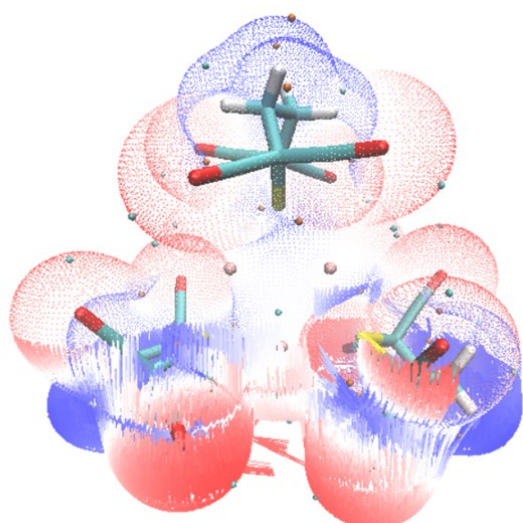

$[\text{Au}_3\{\text{C}_4\text{H}_4(\text{BO})_4\text{Si}\}_3]^-$

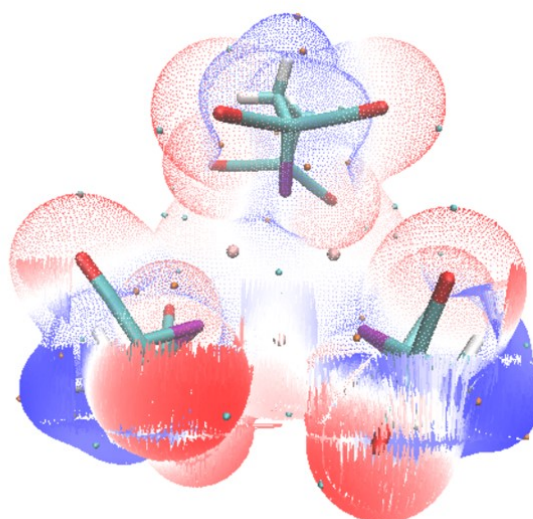

$[\text{Au}_3\{\text{C}_4\text{H}_4(\text{BO})_4\text{Ge}\}_3]^-$

Fig S6: Molecular electrostatic potential map (MEP) of  $[\text{Au}_3\{\text{C}_4\text{H}_4(\text{SiMe}_3)_4\text{Si}\}_3]^-$ ,  $[\text{Au}_3\{\text{C}_4\text{H}_4(\text{SiMe}_3)_4\text{Ge}\}_3]^-$ ,  $[\text{Au}_3\{\text{C}_4\text{H}_4(\text{CN})_4\text{Si}\}_3]^-$ ,  $[\text{Au}_3\{\text{C}_4\text{H}_4(\text{BO})_4\text{Si}\}_3]^-$ ,  $[\text{Au}_3\{\text{C}_4\text{H}_4(\text{CN})_4\text{Ge}\}_3]^-$ , and  $[\text{Au}_3\{\text{C}_4\text{H}_4(\text{BO})_4\text{Si}\}_3]^-$ .

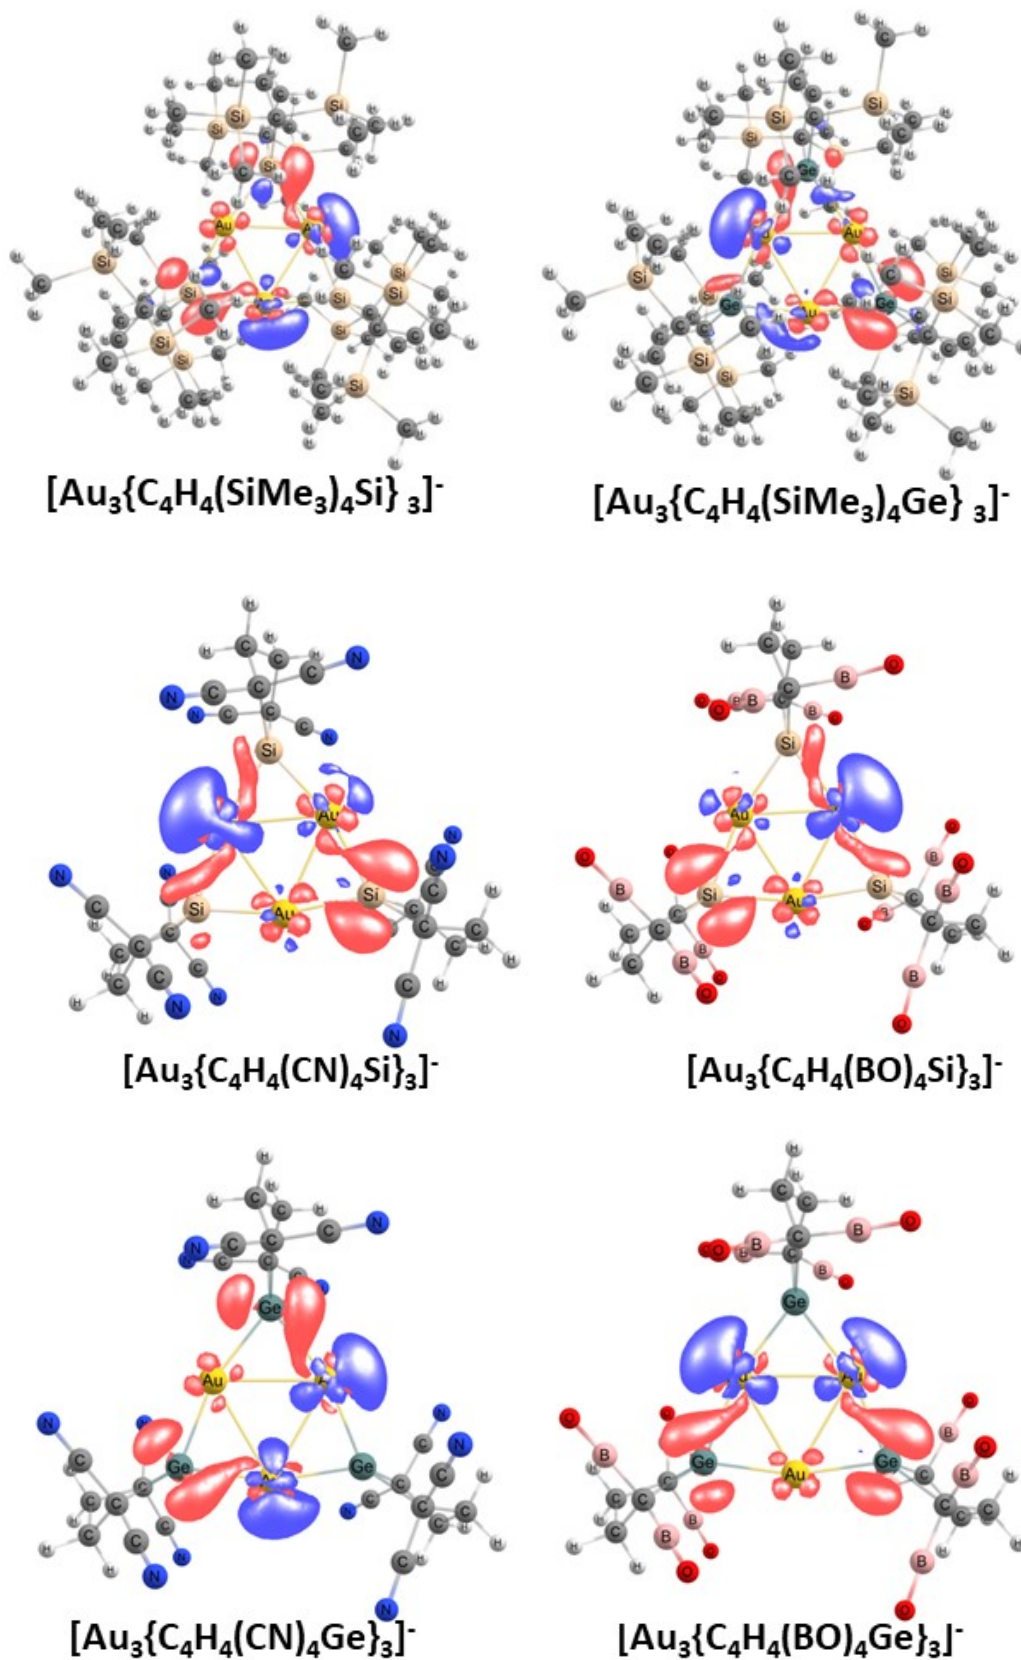

Fig S7: Calculated dual descriptor of  $[\text{Au}_3\{\text{C}_4\text{H}_4(\text{SiMe}_3)_4\text{Si}\}_3]^-$ ,  $[\text{Au}_3\{\text{C}_4\text{H}_4(\text{SiMe}_3)_4\text{Ge}\}_3]^-$ ,  $[\text{Au}_3\{\text{C}_4\text{H}_4(\text{CN})_4\text{Si}\}_3]^-$ ,  $[\text{Au}_3\{\text{C}_4\text{H}_4(\text{BO})_4\text{Si}\}_3]^-$ ,  $[\text{Au}_3\{\text{C}_4\text{H}_4(\text{CN})_4\text{Ge}\}_3]^-$  and  $[\text{Au}_3\{\text{C}_4\text{H}_4(\text{BO})_4\text{Ge}\}_3]^-$ .

Table S2: Cartesian coordinates of optimized geometries of  $[\text{Au}_3\{\text{C}_4\text{H}_4(\text{CF}_3)_4\text{Si}\}_3]^-$

|    |            |           |            |
|----|------------|-----------|------------|
| Au | 0.9335500  | 4.6133930 | -3.7470870 |
| Au | -0.4985320 | 4.6714100 | -1.3411220 |
| Si | -1.4397320 | 4.6660800 | -3.5582910 |
| Si | 0.9324150  | 4.6157240 | 0.5894460  |
| C  | 0.7963190  | 3.1920200 | 1.9431530  |
| C  | -2.5699450 | 3.2451180 | -4.3095260 |
| C  | -2.5431470 | 6.1035360 | -4.3144610 |
| C  | 0.5836600  | 3.9383000 | 3.2799120  |
| H  | -0.4862080 | 4.0825380 | 3.4166420  |
| H  | 0.9297290  | 3.3347950 | 4.1208890  |
| C  | -3.8212850 | 5.3968620 | -4.8208370 |
| H  | -4.5362890 | 5.3706240 | -4.0004200 |
| H  | -4.2870210 | 5.9666450 | -5.6267740 |
| C  | -3.5270600 | 3.9699350 | -5.2834830 |
| H  | -3.0522890 | 3.9981170 | -6.2618670 |
| H  | -4.4575160 | 3.4118190 | -5.3990330 |
| C  | 1.0682230  | 6.0413480 | 1.9411460  |
| C  | 1.2818330  | 5.2967410 | 3.2786820  |
| H  | 2.3518270  | 5.1524320 | 3.4144930  |
| H  | 0.9367690  | 5.9014110 | 4.1192410  |
| Au | 2.3642970  | 4.5576530 | -1.3402350 |
| Si | 3.3068000  | 4.5620570 | -3.5567300 |
| C  | 4.4364470  | 5.9834380 | -4.3079790 |
| C  | 4.4114850  | 3.1250030 | -4.3117470 |
| C  | 5.6890920  | 3.8322730 | -4.8186550 |
| H  | 6.4042720  | 3.8592620 | -3.9984210 |
| H  | 6.1549980  | 3.2624840 | -5.6244870 |
| C  | 5.3938980  | 5.2588460 | -5.2817760 |
| H  | 4.9190000  | 5.2300080 | -6.2600870 |
| H  | 6.3239770  | 5.8175220 | -5.3976740 |
| C  | 2.2719160  | 6.9521170 | 1.6853310  |



|   |            |           |            |
|---|------------|-----------|------------|
| C | -0.4080330 | 2.2817390 | 1.6887940  |
| C | -0.2178860 | 6.8705000 | 1.9989540  |
| C | 2.0820730  | 2.3623890 | 2.0018980  |
| C | -2.9274260 | 7.1354500 | -3.2533600 |
| C | -3.3704350 | 2.5466830 | -3.2082830 |
| C | -1.7327160 | 2.2244660 | -5.0859640 |
| C | -1.8165120 | 6.7833850 | -5.4795490 |
| C | 5.2365610  | 6.6823950 | -3.2067740 |
| C | 3.5988990  | 7.0036240 | -5.0846910 |
| C | 3.6853680  | 2.4437180 | -5.4763120 |
| C | 4.7965180  | 2.0942100 | -3.2498430 |
| F | 4.3583650  | 7.9538030 | -5.6687110 |
| F | 2.7096230  | 7.6394040 | -4.3190550 |
| F | 2.9226850  | 6.4128830 | -6.0799190 |
| F | 6.1205890  | 7.5786030 | -3.6909270 |
| F | 4.4252920  | 1.4810440 | -6.0623680 |
| F | 2.5331550  | 1.8746170 | -5.1247990 |
| F | 3.4133680  | 3.3356240 | -6.4460940 |
| F | 4.4727510  | 7.3333890 | -2.3308760 |
| F | 5.9670710  | 5.7883280 | -2.5149120 |
| F | 3.7476920  | 1.4199910 | -2.7740460 |
| F | 5.6716710  | 1.1790320 | -3.7166570 |
| F | 5.4034090  | 2.6818310 | -2.2082370 |
| F | -3.8018160 | 8.0509830 | -3.7209080 |
| F | -3.5348810 | 6.5490740 | -2.2113880 |
| F | -1.8781080 | 7.8091860 | -2.7779800 |
| F | -4.2548840 | 1.6508380 | -3.6923370 |
| F | -2.4924630 | 1.2743550 | -5.6697270 |
| F | -0.8436280 | 1.5886110 | -4.3201640 |
| F | -2.6069500 | 1.8954090 | -2.3322940 |
| F | -4.1005220 | 3.4412010 | -2.5165700 |
| F | -2.5558560 | 7.7459250 | -6.0665670 |
| F | -0.6640380 | 7.3521590 | -5.1283910 |

|   |            |           |            |
|---|------------|-----------|------------|
| F | -1.5448770 | 5.8904900 | -6.4485350 |
| F | -1.0563110 | 2.8147430 | -6.0813370 |
| F | 3.4121270  | 6.2494530 | 1.6383440  |
| F | 2.4425170  | 7.8589920 | 2.6712730  |
| F | 2.1787920  | 7.6375440 | 0.5433140  |
| F | -0.1959450 | 7.8022820 | 2.9745670  |
| F | -1.2761900 | 6.0855370 | 2.2708140  |
| F | -0.4852230 | 7.5177160 | 0.8646900  |
| F | 3.1404210  | 3.1472170 | 2.2741270  |
| F | 2.0593200  | 1.4309880 | 2.9778510  |
| F | -0.5796990 | 1.3770230 | 2.6765230  |
| F | -0.3152280 | 1.5939890 | 0.5481360  |
| F | 2.3499370  | 1.7146100 | 0.8680890  |
| F | -1.5476330 | 2.9852780 | 1.6401380  |

**Table S3: Cartesian coordinates of optimized geometries of  $[\text{Au}_3\{\text{C}_4\text{H}_4(\text{CN})_4\text{Si}\}_3]^-$**

|    |            |            |            |
|----|------------|------------|------------|
| Au | -1.2227100 | 1.1106290  | 5.3719680  |
| Au | -2.6587330 | 1.1079400  | 7.8343400  |
| Si | -3.5958570 | 1.1527370  | 5.6321450  |
| Si | -1.2244020 | 1.1126710  | 9.7511000  |
| C  | -1.1749940 | -0.3003700 | 11.1236020 |
| C  | -4.8293230 | -0.1970340 | 4.9004680  |
| C  | -4.7055390 | 2.6286420  | 4.9409960  |
| C  | -1.5737450 | 0.4376550  | 12.4278940 |
| H  | -2.6580090 | 0.5699570  | 12.4302420 |
| H  | -1.3076190 | -0.1549080 | 13.3036210 |
| C  | -6.0398330 | 1.9404890  | 4.5525410  |
| H  | -6.6224440 | 1.7820170  | 5.4628260  |
| H  | -6.6251350 | 2.5771260  | 3.8885740  |
| C  | -5.7020420 | 0.6080310  | 3.9017670  |
| H  | -5.1232530 | 0.7649420  | 2.9887740  |
| H  | -6.5994610 | 0.0484730  | 3.6363380  |
| C  | -1.2739590 | 2.5261340  | 11.1231110 |
| C  | -0.8747370 | 1.7885950  | 12.4275270 |

|    |            |            |            |
|----|------------|------------|------------|
| H  | 0.2095330  | 1.6563080  | 12.4295080 |
| H  | -1.1405380 | 2.3814740  | 13.3031400 |
| Au | 0.2111720  | 1.1163640  | 7.8354200  |
| Si | 1.1503360  | 1.0694450  | 5.6343290  |
| C  | 2.3831740  | 2.4189260  | 4.9012760  |
| C  | 2.2613840  | -0.4067800 | 4.9459410  |
| C  | 3.5946630  | 0.2818000  | 4.5547270  |
| H  | 4.1783760  | 0.4419400  | 5.4640070  |
| H  | 4.1795310  | -0.3553510 | 3.8908760  |
| C  | 3.2552210  | 1.6131660  | 3.9025680  |
| H  | 2.6754140  | 1.4546950  | 2.9904810  |
| H  | 4.1519700  | 2.1729530  | 3.6353480  |
| C  | -2.0818400 | -1.3952300 | 10.8064620 |
| N  | -2.8180410 | -2.2435840 | 10.5734140 |
| C  | 0.1947610  | -0.7961340 | 11.2435110 |
| N  | 1.2814500  | -1.1350860 | 11.3901020 |
| C  | -2.6437990 | 3.0216210  | 11.2431130 |
| N  | -3.7305630 | 3.3603210  | 11.3897360 |
| C  | -0.3673880 | 3.6210590  | 10.8054120 |
| N  | 0.3686540  | 4.4694320  | 10.5719320 |
| C  | 3.2297460  | 2.9319690  | 5.9763960  |
| N  | 3.9469290  | 3.2830630  | 6.8006890  |
| C  | 1.6708550  | 3.5120460  | 4.2529800  |
| N  | 1.1137690  | 4.3577810  | 3.7141870  |
| C  | 2.4476000  | -1.4503390 | 5.9455960  |
| N  | 2.6148650  | -2.2573640 | 6.7435630  |
| C  | 1.6304120  | -0.9601860 | 3.7496280  |
| N  | 1.1769740  | -1.3486750 | 2.7695690  |
| C  | -4.1174880 | -1.2906180 | 4.2524140  |
| N  | -3.5607750 | -2.1366980 | 3.7137760  |
| C  | -5.6752220 | -0.7093280 | 5.9764770  |
| N  | -6.3919270 | -1.0599100 | 6.8014000  |
| C  | -4.8898320 | 3.6749500  | 5.9381010  |

|   |            |           |           |
|---|------------|-----------|-----------|
| N | -5.0556110 | 4.4842720 | 6.7340490 |
| C | -4.0750750 | 3.1781780 | 3.7426230 |
| N | -3.6222990 | 3.5634100 | 2.7609690 |

**Table S4: Cartesian coordinates of optimized geometries of  $[\text{Au}_3\{\text{C}_4\text{H}_4(\text{BO})_4\text{Si}\}_3]^-$**

|    |            |            |            |
|----|------------|------------|------------|
| Au | -1.1454430 | -0.3434450 | 5.2711830  |
| Au | -2.8005370 | -0.2859860 | 7.7330610  |
| Si | -3.4042780 | 0.3550950  | 5.5121890  |
| Si | -1.4376120 | 0.3119990  | 9.5849740  |
| C  | -1.4420810 | -0.1499460 | 11.4784040 |
| C  | -5.0634820 | -0.0569540 | 4.5761110  |
| C  | -3.7024230 | 2.2699500  | 5.3548460  |
| C  | -1.3495960 | 1.2098660  | 12.2462760 |
| H  | -2.3572920 | 1.5653740  | 12.4734040 |
| H  | -0.8264720 | 1.0954210  | 13.1967500 |
| C  | -5.2555120 | 2.3425130  | 5.3087430  |
| H  | -5.6581050 | 2.1057720  | 6.2983030  |
| H  | -5.6026500 | 3.3434250  | 5.0459800  |
| C  | -5.7465150 | 1.3210560  | 4.2852390  |
| H  | -5.4694240 | 1.6555900  | 3.2829580  |
| H  | -6.8339820 | 1.2383980  | 4.3086000  |
| C  | -1.3497840 | 2.2175080  | 9.9665420  |
| C  | -0.6457150 | 2.2296460  | 11.3536610 |
| H  | 0.4068730  | 1.9570830  | 11.2293940 |
| H  | -0.6740150 | 3.2208730  | 11.8096350 |
| Au | 0.1616590  | -0.3667590 | 7.9452140  |
| Si | 1.1054930  | 0.2211980  | 5.8429960  |
| C  | 1.4676550  | 2.1224300  | 5.6264650  |
| C  | 2.7261440  | -0.2777730 | 4.8818890  |
| C  | 3.4077360  | 1.0685080  | 4.4698530  |
| H  | 4.1147220  | 1.3682620  | 5.2467600  |
| H  | 3.9723160  | 0.9609270  | 3.5425840  |
| C  | 2.3283100  | 2.1398800  | 4.3305150  |
| H  | 1.6924750  | 1.9206330  | 3.4672760  |
| H  | 2.7796640  | 3.1194530  | 4.1631940  |
| O  | -0.9571450 | 3.3054850  | 5.2265310  |

|   |            |            |            |
|---|------------|------------|------------|
| O | 3.2279070  | 2.8513600  | 7.5694250  |
| O | 2.0033470  | -1.6838800 | 2.6514190  |
| O | 4.3011600  | -1.8489810 | 6.4679470  |
| O | -2.7589380 | 3.3750180  | 7.6617350  |
| O | -6.6152500 | -1.5823580 | 6.2308770  |
| O | -4.5066910 | -1.4885120 | 2.3166750  |
| O | -2.9208300 | 3.0221970  | 2.8573930  |
| O | 0.2478010  | 3.3047820  | 8.0408430  |
| O | -3.8669810 | 3.1040650  | 10.5080050 |
| O | 0.7762390  | -1.6641150 | 11.9884920 |
| O | -3.6845530 | -1.5870270 | 12.0877450 |
| B | -0.5458940 | 2.8697020  | 8.8484940  |
| B | -2.7833260 | 2.7574930  | 10.1040950 |
| B | -0.2049060 | -1.0136050 | 11.7328720 |
| B | -2.6968860 | -0.9574100 | 11.8073220 |
| B | 0.1240640  | 2.8267000  | 5.4977300  |
| B | 2.3186660  | 2.5845930  | 6.8212850  |
| B | 2.2954330  | -1.0796240 | 3.6518150  |
| B | 3.5978780  | -1.1590200 | 5.7753540  |
| B | -3.0872660 | 2.9303950  | 6.5818270  |
| B | -3.1106150 | 2.7364860  | 4.0148220  |
| B | -5.9066720 | -0.9230680 | 5.5136740  |
| B | -4.7421230 | -0.8605760 | 3.3168240  |

Table S5: Cartesian coordinates of optimized geometries of  $[\text{Au}_3\{\text{C}_4\text{H}_4(\text{CF}_3)_4\text{Ge}\}_3]^-$

|    |              |             |              |
|----|--------------|-------------|--------------|
| Au | 0.935075000  | 4.339784000 | -3.836105000 |
| Au | -0.514111000 | 4.549606000 | -1.357335000 |
| C  | 0.773234000  | 3.123734000 | 2.085843000  |
| C  | -2.865198000 | 3.221595000 | -4.327691000 |
| C  | -2.530241000 | 6.112983000 | -4.409942000 |
| C  | 0.603703000  | 3.923242000 | 3.393175000  |
| H  | -0.460240000 | 4.089225000 | 3.549916000  |
| H  | 0.957862000  | 3.342435000 | 4.247218000  |
| C  | -3.878243000 | 5.505687000 | -4.846444000 |
| H  | -4.561270000 | 5.561280000 | -4.001226000 |
| H  | -4.323943000 | 6.094910000 | -5.650116000 |

|    |              |             |              |
|----|--------------|-------------|--------------|
| C  | -3.740005000 | 4.046886000 | -5.291786000 |
| H  | -3.276154000 | 4.013954000 | -6.275549000 |
| H  | -4.729560000 | 3.597281000 | -5.395231000 |
| C  | 1.095455000  | 6.019353000 | 2.021622000  |
| C  | 1.324960000  | 5.270664000 | 3.349464000  |
| H  | 2.395317000  | 5.107358000 | 3.459735000  |
| H  | 1.013758000  | 5.885876000 | 4.196206000  |
| Au | 2.394779000  | 4.411907000 | -1.352119000 |
| C  | 4.420817000  | 6.028112000 | -4.366207000 |
| C  | 4.711577000  | 3.132874000 | -4.386915000 |
| C  | 5.889669000  | 4.002974000 | -4.868812000 |
| H  | 6.587931000  | 4.113125000 | -4.041898000 |
| H  | 6.431856000  | 3.503253000 | -5.673773000 |
| C  | 5.434175000  | 5.387622000 | -5.335747000 |
| H  | 4.957308000  | 5.301594000 | -6.310241000 |
| H  | 6.301971000  | 6.036892000 | -5.467706000 |
| C  | 2.298625000  | 6.916291000 | 1.738911000  |
| C  | -0.465450000 | 2.259350000 | 1.865757000  |
| C  | -0.189903000 | 6.842314000 | 2.078384000  |
| C  | 2.032420000  | 2.262526000 | 2.141858000  |
| C  | -2.759699000 | 7.201546000 | -3.364159000 |
| C  | -3.703927000 | 2.674766000 | -3.175881000 |
| C  | -2.183669000 | 2.082484000 | -5.081286000 |
| C  | -1.782789000 | 6.671371000 | -5.619539000 |
| C  | 5.148250000  | 6.764838000 | -3.244386000 |
| C  | 3.504232000  | 6.975529000 | -5.138297000 |
| C  | 4.084213000  | 2.387003000 | -5.562096000 |
| C  | 5.185118000  | 2.156960000 | -3.314347000 |
| F  | 4.188095000  | 7.969621000 | -5.744685000 |
| F  | 2.582036000  | 7.556184000 | -4.367806000 |
| F  | 2.855864000  | 6.327076000 | -6.117021000 |
| F  | 5.940894000  | 7.755802000 | -3.700459000 |
| F  | 4.966632000  | 1.599548000 | -6.210603000 |
| F  | 3.064164000  | 1.603561000 | -5.210625000 |
| F  | 3.623800000  | 3.254876000 | -6.481662000 |

|    |              |             |              |
|----|--------------|-------------|--------------|
| F  | 4.329839000  | 7.311218000 | -2.345886000 |
| F  | 5.962386000  | 5.922685000 | -2.579239000 |
| F  | 4.190988000  | 1.430040000 | -2.797241000 |
| F  | 6.104925000  | 1.285570000 | -3.779834000 |
| F  | 5.771696000  | 2.805670000 | -2.296905000 |
| F  | -3.499752000 | 8.224778000 | -3.839762000 |
| F  | -3.432435000 | 6.720355000 | -2.308103000 |
| F  | -1.624487000 | 7.729612000 | -2.901018000 |
| F  | -4.706674000 | 1.875720000 | -3.592931000 |
| F  | -3.071494000 | 1.217929000 | -5.616831000 |
| F  | -1.363776000 | 1.362245000 | -4.309888000 |
| F  | -2.995096000 | 1.967128000 | -2.296238000 |
| F  | -4.293979000 | 3.679385000 | -2.501358000 |
| F  | -2.480645000 | 7.626698000 | -6.267964000 |
| F  | -0.600060000 | 7.203571000 | -5.315483000 |
| F  | -1.564670000 | 5.701565000 | -6.527742000 |
| F  | -1.457502000 | 2.547066000 | -6.107583000 |
| F  | 3.429616000  | 6.199451000 | 1.668303000  |
| F  | 2.498462000  | 7.822198000 | 2.720545000  |
| F  | 2.189678000  | 7.601324000 | 0.598411000  |
| F  | -0.164247000 | 7.784650000 | 3.043921000  |
| F  | -1.243766000 | 6.055959000 | 2.364486000  |
| F  | -0.467478000 | 7.474224000 | 0.937737000  |
| F  | 3.112556000  | 3.022211000 | 2.403679000  |
| F  | 1.989858000  | 1.336120000 | 3.122015000  |
| F  | -0.682597000 | 1.409987000 | 2.893065000  |
| F  | -0.401110000 | 1.517126000 | 0.757327000  |
| F  | 2.279132000  | 1.602605000 | 1.009337000  |
| F  | -1.571318000 | 3.012589000 | 1.778515000  |
| Ge | 0.938357000  | 4.541755000 | 0.618426000  |
| Ge | 3.366423000  | 4.453694000 | -3.604741000 |
| Ge | -1.489830000 | 4.549260000 | -3.609226000 |

Table S6: Cartesian coordinates of optimized geometries of  $[\text{Au}_3\{\text{C}_4\text{H}_4(\text{CN})_4\text{Ge}\}_3]^-$

|    |            |            |            |
|----|------------|------------|------------|
| Au | -0.6897690 | 0.3706150  | -2.4436850 |
| Au | -2.1608180 | 0.3849520  | 0.0870540  |
| C  | -0.6740010 | -1.0705750 | 3.5075600  |

|    |            |            |            |
|----|------------|------------|------------|
| C  | -4.4395040 | -0.9717920 | -2.8971720 |
| C  | -4.3247560 | 1.9168770  | -2.8844910 |
| C  | -1.0581600 | -0.2916380 | 4.7872370  |
| H  | -2.1387720 | -0.1315230 | 4.7813950  |
| H  | -0.8149610 | -0.8745170 | 5.6766690  |
| C  | -5.6476940 | 1.1874070  | -3.2152410 |
| H  | -6.1967490 | 1.0331260  | -2.2834330 |
| H  | -6.2697670 | 1.8015330  | -3.8676380 |
| C  | -5.3231080 | -0.1499750 | -3.8649050 |
| H  | -4.7667720 | 0.0029050  | -4.7925160 |
| H  | -6.2325980 | -0.6995370 | -4.1113240 |
| C  | -0.7094850 | 1.8192320  | 3.5053830  |
| C  | -0.3259080 | 1.0422470  | 4.7864050  |
| H  | 0.7547100  | 0.8821570  | 4.7813260  |
| H  | -0.5695520 | 1.6264550  | 5.6748450  |
| Au | 0.7795100  | 0.3592600  | 0.0881330  |
| C  | 3.0583660  | 1.7160250  | -2.8960170 |
| C  | 2.9470730  | -1.1727580 | -2.8813070 |
| C  | 4.2688430  | -0.4419040 | -3.2136910 |
| H  | 4.8185200  | -0.2863520 | -2.2824650 |
| H  | 4.8910780  | -1.0557420 | -3.8662030 |
| C  | 3.9421720  | 0.8946810  | -3.8639460 |
| H  | 3.3852640  | 0.7405920  | -4.7910210 |
| H  | 4.8508240  | 1.4451580  | -4.1114200 |
| C  | -1.6128090 | -2.1353490 | 3.1971700  |
| N  | -2.3790860 | -2.9572370 | 2.9642820  |
| C  | 0.6832520  | -1.5890960 | 3.6217490  |
| N  | 1.7675520  | -1.9403980 | 3.7593580  |
| C  | -2.0667940 | 2.3379050  | 3.6181730  |
| N  | -3.1511610 | 2.6893840  | 3.7548020  |
| C  | 0.2294780  | 2.8835160  | 3.1937810  |
| N  | 0.9958890  | 3.7050050  | 2.9599330  |
| C  | 3.8613180  | 2.2155090  | -1.7871080 |
| N  | 4.5422760  | 2.5523010  | -0.9264610 |
| C  | 2.3572970  | 2.8016120  | -3.5606230 |
| N  | 1.7999850  | 3.6396480  | -4.1119180 |
| C  | 3.1182130  | -2.2168720 | -1.8845870 |
| N  | 3.2726800  | -3.0216620 | -1.0812290 |
| C  | 2.3470650  | -1.7078660 | -4.0965200 |
| N  | 1.9105700  | -2.0771410 | -5.0919730 |
| C  | -3.7395260 | -2.0580640 | -3.5618070 |
| N  | -3.1830220 | -2.8966380 | -4.1131010 |
| C  | -5.2423870 | -1.4704030 | -1.7878210 |
| N  | -5.9232520 | -1.8064910 | -0.9268250 |
| C  | -4.4939900 | 2.9625650  | -1.8891040 |
| N  | -4.6470120 | 3.7686820  | -1.0868020 |
| C  | -3.7246950 | 2.4494810  | -4.1007850 |
| N  | -3.2883150 | 2.8167530  | -5.0970320 |
| Ge | -0.6913320 | 0.3732400  | 2.0452990  |
| Ge | -3.1171830 | 0.4191010  | -2.1656090 |
| Ge | 1.7375070  | 0.3241630  | -2.1638340 |

Table S7: Cartesian coordinates of optimized geometries of  $[\text{Au}_3\{\text{C}_4\text{H}_4(\text{BO})_4\text{Ge}\}_3]^-$

|    |            |           |            |
|----|------------|-----------|------------|
| Au | -1.2987920 | 2.6826490 | 5.1909710  |
| Au | -2.6708060 | 2.7092610 | 7.9687120  |
| C  | -1.1116720 | 0.0056820 | 10.0094790 |
| C  | -3.9669570 | 0.0992300 | 5.6105820  |



|    |            |            |            |
|----|------------|------------|------------|
| C  | -5.2963670 | 2.5018510  | 4.7320890  |
| C  | -1.7975680 | -0.0192200 | 11.3999190 |
| H  | -2.8509700 | 0.2585650  | 11.2948420 |
| H  | -1.7694880 | -1.0192490 | 11.8373740 |
| C  | -5.9387000 | 1.1093460  | 4.4489480  |
| H  | -6.6067570 | 0.8427350  | 5.2714900  |
| H  | -6.5425050 | 1.1349470  | 3.5400110  |
| C  | -4.8415070 | 0.0525410  | 4.3307830  |
| H  | -4.2215840 | 0.2549730  | 3.4518140  |
| H  | -5.2867510 | -0.9347180 | 4.1924520  |
| C  | -1.0271290 | 2.3758440  | 11.6450560 |
| C  | -1.0848610 | 0.9712960  | 12.3202200 |
| H  | -0.0681490 | 0.6172840  | 12.5070010 |
| H  | -1.5884320 | 1.0225550  | 13.2870560 |
| Au | 0.3925600  | 2.6266680  | 7.7522400  |
| C  | 2.8133030  | 2.2514530  | 4.5599390  |
| C  | 1.2676920  | -0.0548610 | 5.3258960  |
| C  | 2.8110260  | -0.1796040 | 5.2472830  |
| H  | 3.2470800  | 0.0285460  | 6.2293630  |
| H  | 3.1123300  | -1.1914270 | 4.9688890  |
| C  | 3.3359700  | 0.8212930  | 4.2198650  |
| H  | 2.9839010  | 0.5327920  | 3.2264280  |
| H  | 4.4268410  | 0.8014950  | 4.1904360  |
| O  | 2.4414250  | 3.8112660  | 2.3521300  |
| O  | 4.4541750  | 3.4433350  | 6.3890250  |
| O  | 0.4031980  | -0.7485210 | 2.8418540  |
| O  | 0.2952850  | -1.0652800 | 7.6623270  |
| O  | -6.8759520 | 4.1486390  | 6.2287980  |
| O  | -5.7066390 | -0.5576490 | 7.5930380  |
| O  | -1.5077590 | -1.0144710 | 5.2375650  |
| O  | -4.5303140 | 3.6532030  | 2.3775140  |
| O  | 1.2044440  | 3.8185170  | 12.2711460 |
| O  | -3.2768110 | 3.8244020  | 12.1943200 |
| O  | 1.4173150  | -0.8649530 | 10.5048150 |
| O  | -2.7217850 | -1.0054480 | 8.0551740  |
| B  | 0.2194050  | 3.1842160  | 11.9897160 |
| B  | -2.2797460 | 3.2009850  | 11.9309380 |
| B  | 0.3261950  | -0.5222910 | 10.1169780 |
| B  | -1.9254070 | -0.6040560 | 8.8777730  |
| B  | 2.6018500  | 3.1297310  | 3.3325990  |
| B  | 3.7096670  | 2.9416760  | 5.5853660  |
| B  | 0.6273380  | -0.4852660 | 3.9988860  |
| B  | 0.6402560  | -0.6624240 | 6.5708730  |
| B  | -6.1733450 | 3.4288890  | 5.5652080  |
| B  | -4.8505450 | 3.1730630  | 3.4354970  |
| B  | -4.8016210 | -0.3206370 | 6.8290530  |
| B  | -2.6073800 | -0.5686580 | 5.4923660  |
| Ge | -1.0220670 | 2.0036770  | 9.6354030  |
| Ge | -3.5955630 | 2.0963470  | 5.7934020  |
| Ge | 1.0151780  | 1.9599220  | 5.4853500  |
